# Supplementary material for: Levodopa-Reduced Mucuna pruriens Seed Extract Shows Neuroprotective Effects against Parkinson’s Disease in Murine Microglia and Human Neuroblastoma Cells, Caenorhabditis elegans, and Drosophila melanogaster
Source: Nutrients. 2018 Aug 22;10(9):1139. doi: 10.3390/nu10091139 (PMC6164394; doi:10.3390/nu10091139)
Supplement: Supplementary file 1 [file nutrients-10-01139-s001.pdf]

## Supplementary Materials

**Levodopa-Reduced *Mucuna pruriens* Seed Extract shows Neuroprotective Effects against Parkinson's Disease in Murine Microglia and Human Neuroblastoma Cells, *Caenorhabditis elegans*, and *Drosophila melanogaster***

Shelby L. Johnson<sup>2,3</sup>, Hyun Young Park<sup>4,5</sup>, Nicholas A. DaSilva<sup>2,3</sup>, Dhiraj A. Vatter<sup>4,5\*</sup>, Hang Ma<sup>1,2,3\*</sup>, Navindra P. Seeram<sup>2,3\*</sup>

<sup>1</sup> School of Biotechnology and Health Sciences, Wuyi University; International Healthcare Innovation Institute (Jiangmen), Jiangmen 529020, Guangdong, China; hang\_ma@uri.edu (H.M.)

<sup>2</sup> Bioactive Botanical Research Laboratory, Department of Biomedical and Pharmaceutical Sciences, College of Pharmacy, University of Rhode Island, Kingston, RI 02881, USA; shelby\_johnson@uri.edu (S.L.J.); ndasilva@my.uri.edu (N.A.D.); nseeram@uri.edu (N.P.S.)

<sup>3</sup> George and Anne Ryan Institute for Neuroscience, University of Rhode Island, Kingston, RI 02881, USA

<sup>4</sup> Edison Biotechnology Institute, Ohio University, Athens, OH 45701, USA; vatter@ohio.edu (D.A.V.); parkh4@ohio.edu (H.Y.P.)

<sup>5</sup> School of Applied Health Sciences and Wellness, Ohio University, Athens, OH 45701, USA

## List of contents

|                                                                                                                                                                                 |           |
|---------------------------------------------------------------------------------------------------------------------------------------------------------------------------------|-----------|
| <b>HPLC-DAD analyses of <i>Mucuna pruriens</i> extracts .....</b>                                                                                                               | <b>3</b>  |
| <b>Morphological analysis.....</b>                                                                                                                                              | <b>3</b>  |
| <b>Figure S1. LC-ESI-MS/MS spectra for quantifications of L-dopa in <i>Mucuna pruriens</i> extracts .....</b>                                                                   | <b>4</b>  |
| <b>Figure S2. HPLC-DAD chromatograms of <i>Mucuna pruriens</i> extracts .....</b>                                                                                               | <b>7</b>  |
| <b>Figure S3. Effects of <i>Mucuna pruriens</i> extracts on the cell viability and LPS-induced NO production in murine BV-2 microglia .....</b>                                 | <b>8</b>  |
| <b>Figure S4. Morphology of BV-2 murine microglia treated with H<sub>2</sub>O<sub>2</sub>+MPE, H<sub>2</sub>O<sub>2</sub>+0.07% L-dopa, LPS+MPE, and LPS+0.07% L-dopa .....</b> | <b>9</b>  |
| <b>Figure S5. Effects of MPE and 0.07% L-dopa on H<sub>2</sub>O<sub>2</sub>-induced toxicity in murine BV-2 microglia .....</b>                                                 | <b>10</b> |
| <b>Figure S6. Effects of MPE and 0.07% L-dopa on LPS-induced NO production in murine BV-2 microglia .....</b>                                                                   | <b>11</b> |
| <b>Table S1. Chemical constituents of <i>Mucuna pruriens</i> .....</b>                                                                                                          | <b>12</b> |
| <b>References.....</b>                                                                                                                                                          | <b>13</b> |

### **HPLC-DAD analyses of *Mucuna pruriens* extracts**

Chemical profiles of *Mucuna pruriens* extracts were performed using HPLC-DAD method. *M. pruriens* extracts including crude methanol, n-hexanes, ethyl acetate, butanol, and water extracts were prepared in 50% methanol/water (25 mg/mL). The column used was a Waters Sunfire® C18 column (250 mm × 4.6 mm i.d., 5 µm; Milford, MA, USA) at room temperature. Solvent system consisted of 0.1% trifluoroacetic acid in water (A) and methanol (B). 0-25 min 97% A, 25-66 min 50% A, 66-81 min 5% A, 81-95 min 5% A, 95-96 min 97% A, and 96-110 min 97%A at a flow rate of 0.75 mL/min. Wavelength range for DAD detection was 220-520 nm and peaks were monitored at the wavelength of 250 nm. HPLC-DAD chromatograms are shown in Figure S2.

### **Morphological analyses**

Murine BV-2 microglia cells were stained with crystal violet staining post treatments to visualize morphological changes. Cells were fixed in 70% ethanol for 5 min, then stained with 0.5% crystal violet stain (Sigma-Aldrich Chemical Co., St. Louis, MO, USA) for 10 min. Cells were then washed in phosphate buffered saline, then imaged with EVOS® FL Cell Imaging System (ThermoFisher Scientific, Waltham, MA, USA) in phase at 40X (Figure S4).

**Figure S1.** LC-ESI-MS/MS spectra of L-dopa (A) and L-dopa in the *Mucuna pruriens* extracts including crude methanol (B), n-hexanes (C), ethyl acetate (D), butanol (E), and water (F) extracts. The presence of L-dopa in the *Mucuna* extracts was identified as a peak with a retention time of 3.95 min with an ion transition of 198/152.

(A)

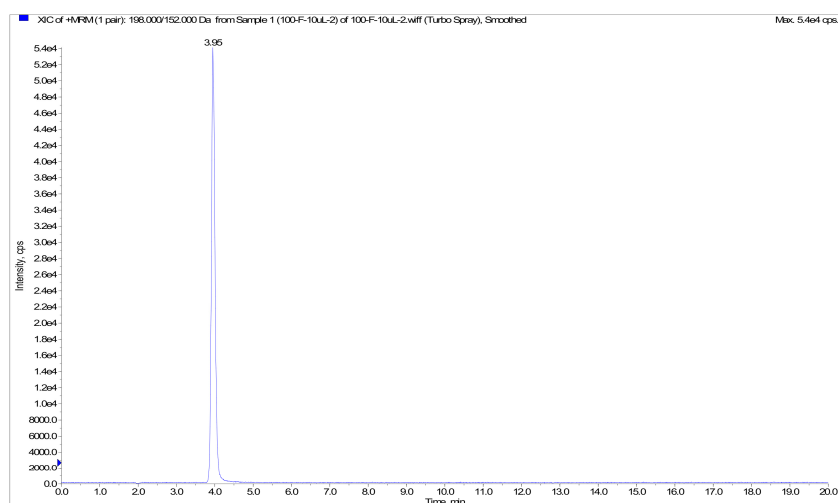

(B)

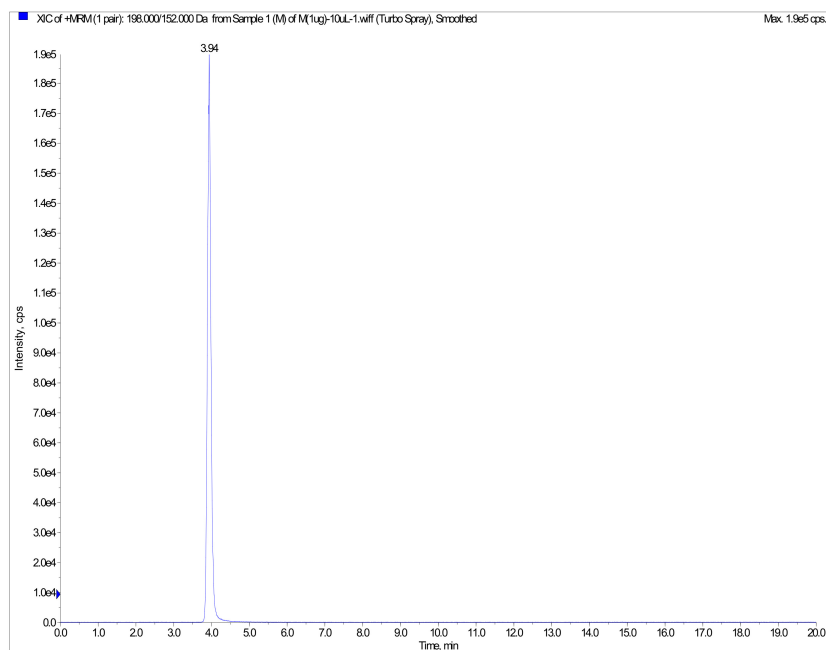

(C)

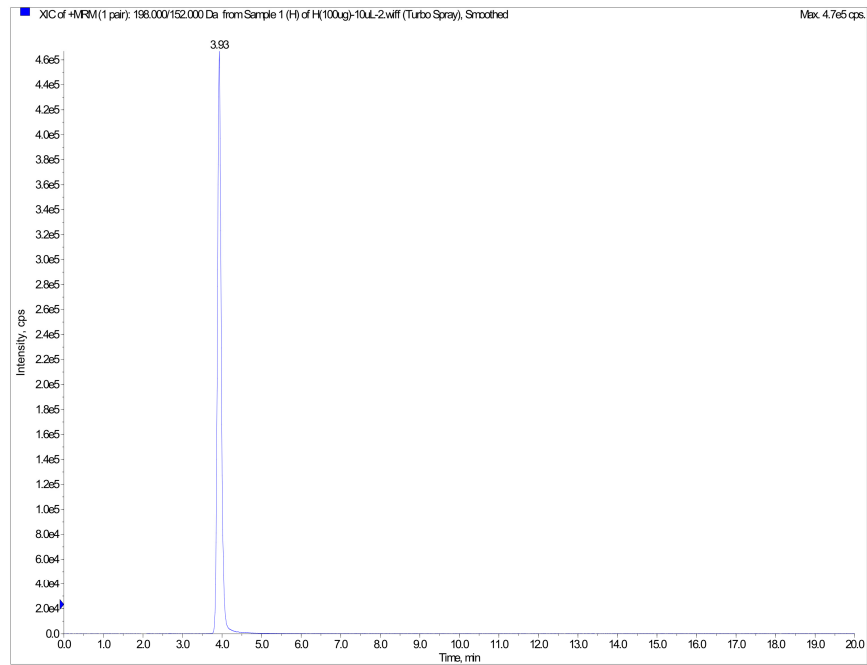

(D)

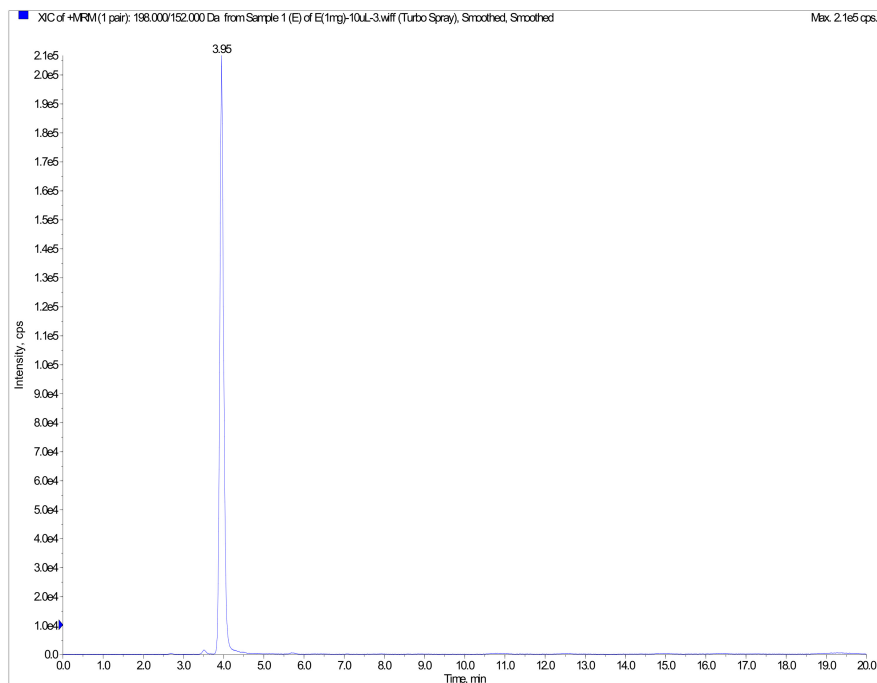

(E)

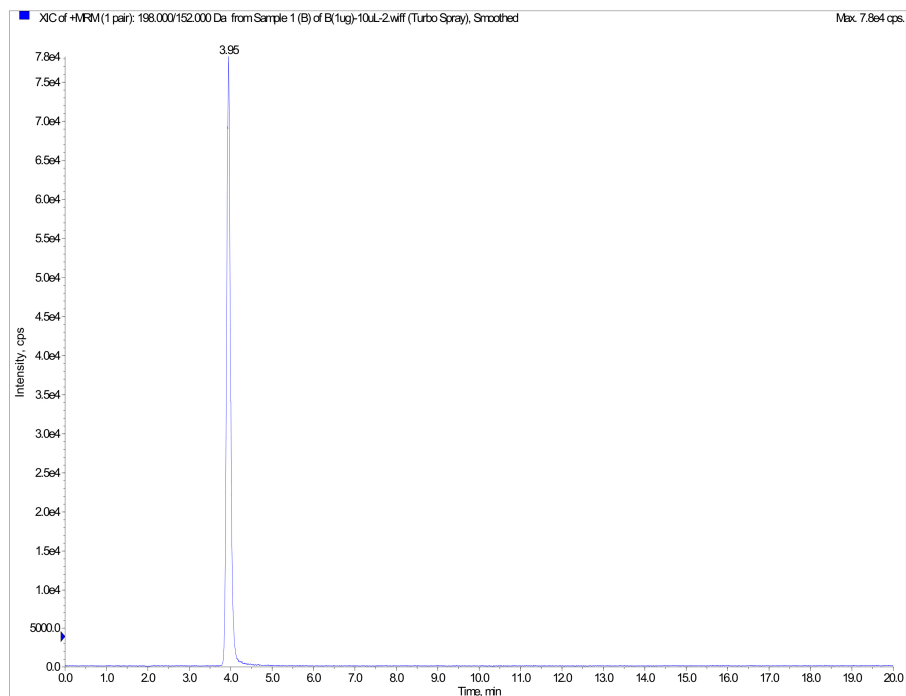

(F)

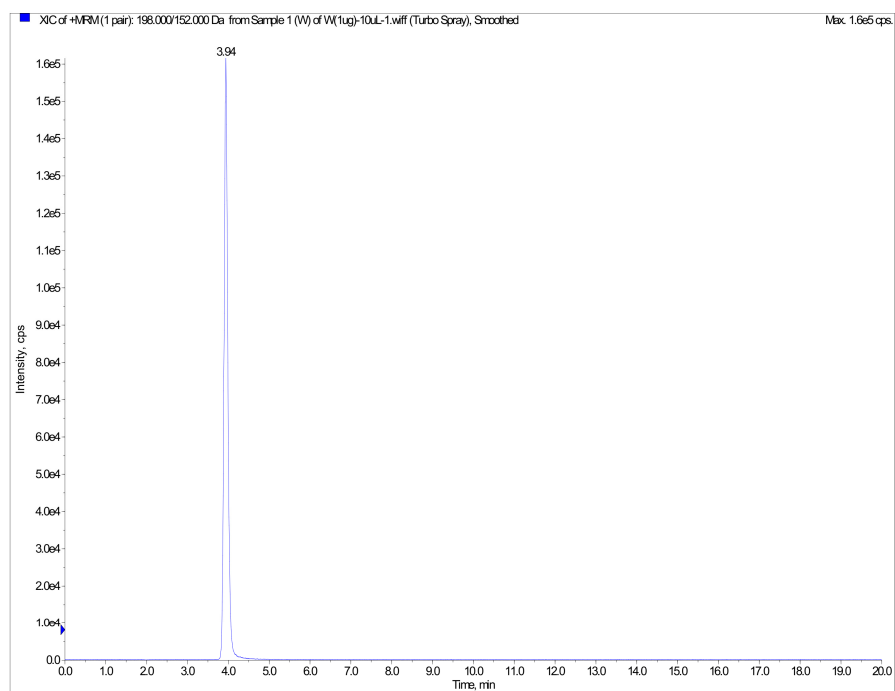

**Figure S2.** HPLC-DAD chromatograms of profiles of *Mucuna pruriens* extracts including crude methanol (A), n-hexanes (B), ethyl acetate (C), butanol (D), and water (E) extracts. Peaks were monitored at a wavelength of 250 nm.

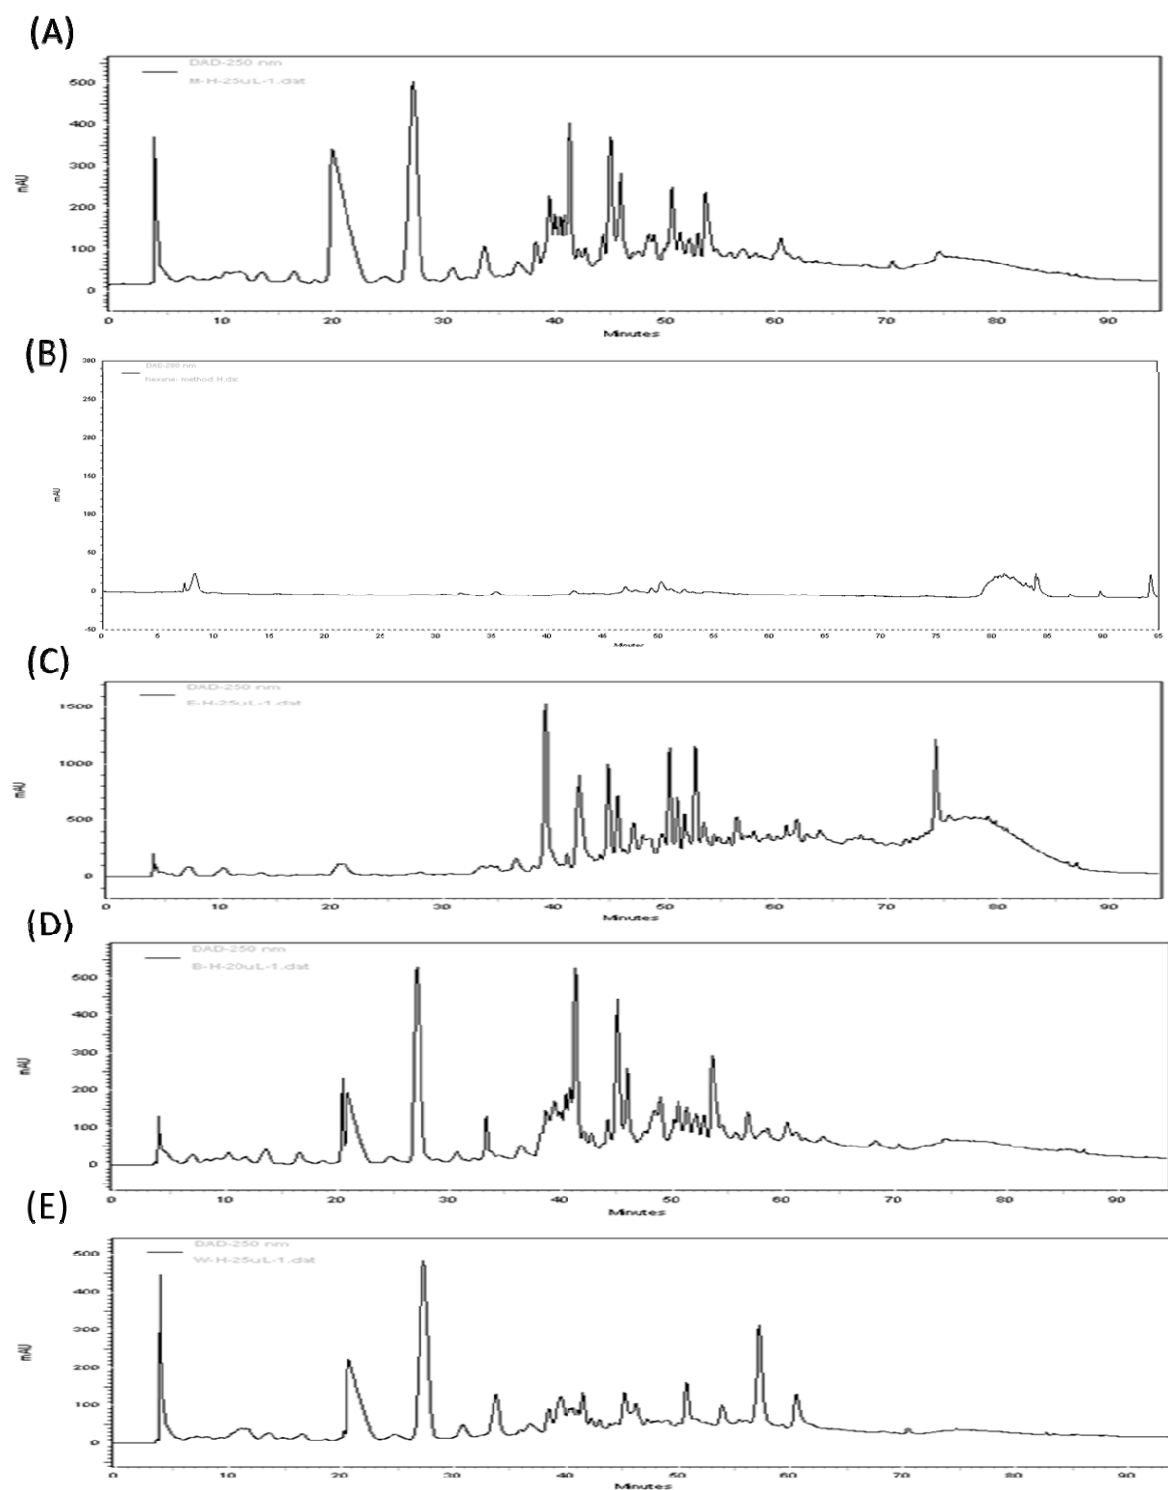

**Figure S3.** Effects of *Mucuna pruriens* extracts including crude methanol, n-hexanes, ethyl acetate, butanol, and water extract (at concentration of 25  $\mu\text{g/mL}$ ) on the cell viability (A) and LPS-induced NO production in murine BV-2 microglia (B). Significance was reported by ANOVA followed with Dunnett multiple comparison testing, as compared to control  $p \leq 0.0001$  (####); as compared to toxic agent,  $p \leq 0.05$  (\*),  $p \leq 0.001$  (\*\*\*) and  $p \leq 0.0001$  (\*\*\*\*).

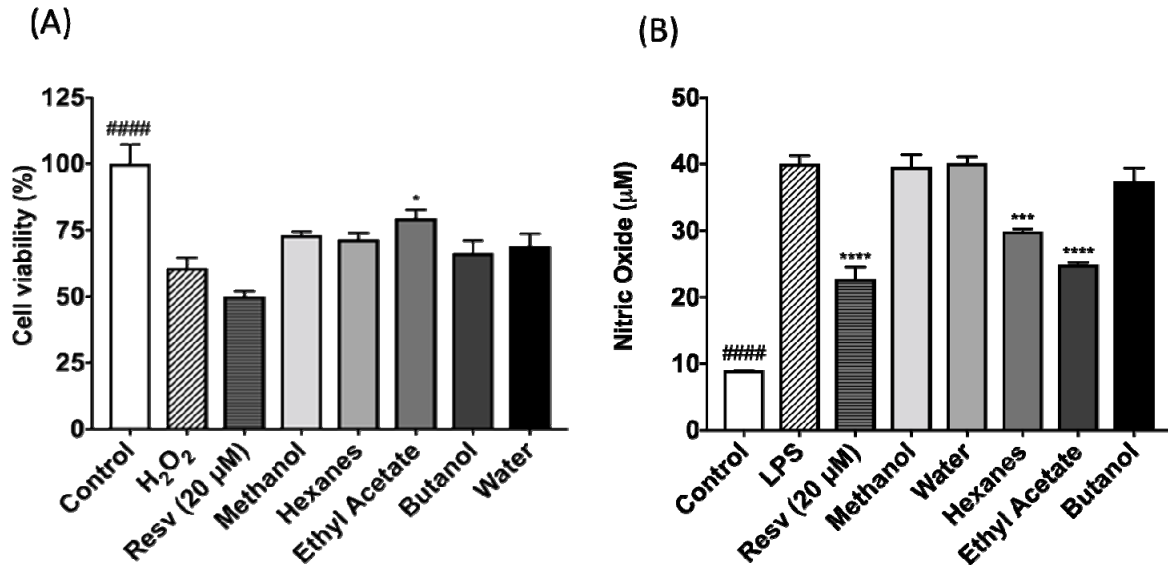

**Figure S4.** Morphology of murine BV-2 microglia treated with vehicle (A), H<sub>2</sub>O<sub>2</sub> alone (B), H<sub>2</sub>O<sub>2</sub>+0.07% L-dopa (C), and H<sub>2</sub>O<sub>2</sub>+MPE (D); murine BV-2 microglia treated with vehicle (E), LPS alone (F), LPS+0.07% L-dopa (G), and LPS+MPE (H).

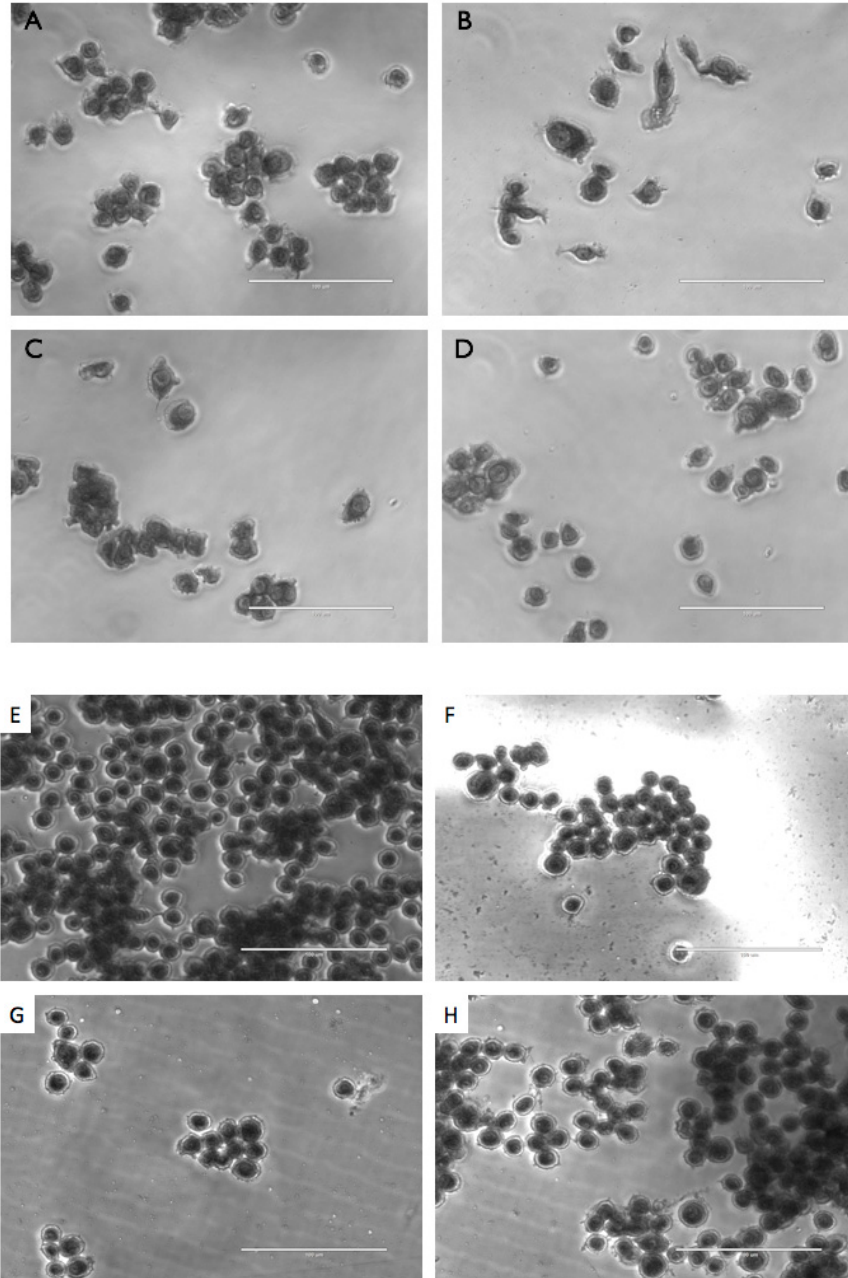

**Figure S5.** Effects of MPE and 0.07% L-dopa on H<sub>2</sub>O<sub>2</sub>-induced toxicity in murine BV-2 microglia. Significance was reported by ANOVA followed with Dunnett multiple comparison testing, as compared to control  $p \leq 0.0001$  (####); as compared to toxic agent,  $p \leq 0.05$  (\*).

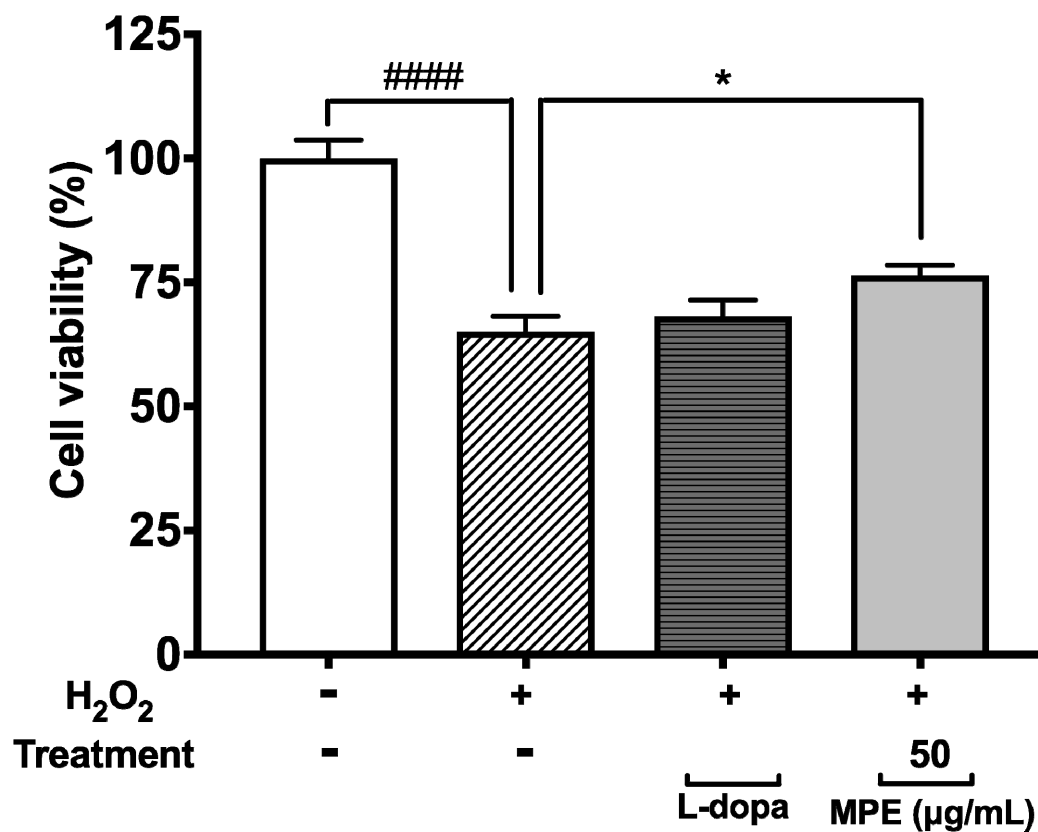

**Figure S6.** Effects of MPE and 0.07% L-dopa on LPS-induced NO production in murine BV-2 microglia. Significance was reported by ANOVA followed with Dunnett multiple comparison testing, as compared to control  $p \leq 0.0001$  (####); as compared to toxic agent,  $p \leq 0.0001$  (\*\*\*\*).

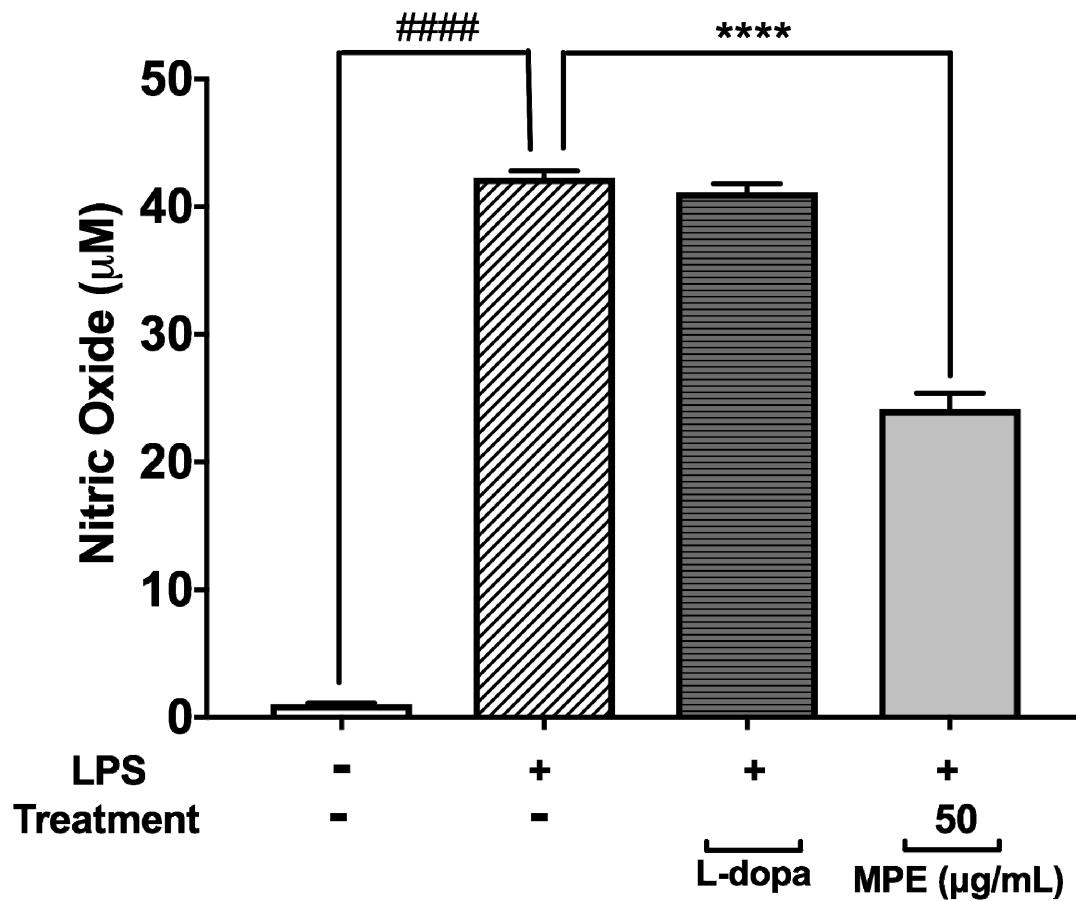

**Table S1.** Chemical constituents of *Mucuna pruriens*.

| Type of chemicals         | chemicals                                                                                                                                                                                                                          | References |
|---------------------------|------------------------------------------------------------------------------------------------------------------------------------------------------------------------------------------------------------------------------------|------------|
| Polyphenols               | Tannins, flavonoids (e.g. genistein and daidzein), gallic acid, phenolic acids                                                                                                                                                     | [1][2]     |
| Saponins                  |                                                                                                                                                                                                                                    | [1][2]     |
| Terpenoids                |                                                                                                                                                                                                                                    | [1][2]     |
| Alkaloids and amino acids | $\beta$ -Carboline, N,N-Dimethyl tryptamine, 5- hydroxytryptamine, bufotenine, tetrahydroisoquinoline, hydroisoquinoline, 5-oxyindole- 3- alkylamine, 6- methoxyharman, arahidicacid, arginine, glutathione, indole- 3- alkylamine | [3] [4]    |
| Fatty acids               | Linoleic acid, myristic acid, oleic acid, palmitic acid, vernolic acid, stearic acid                                                                                                                                               | [5]        |
| Carbohydrates             | oligosaccharides (e.g. raffinose, stachyose, verbascose)                                                                                                                                                                           | [6]        |

**References:**

1. Kasture, S.; Mohan, M.; Kasture, V. *Mucuna pruriens* seeds in treatment of Parkinson's disease: Pharmacological review. *Orient. Pharm. Exp. Med.* **2013**, *13*, 165–174, doi:10.1007/s13596-013-0126-2.
2. Sridhar, K. R.; Bhat, R. Agrobotanical, nutritional and bioactive potential of unconventional legume - *Mucuna*. *Livest. Res. Rural Dev.* **2007**, *19*.
3. Damodaran, M.; Ramaswamy, R. Isolation of 1 -3:4-dihydroxyphenylalanine from the seeds of *Mucuna pruriens*. *Biochem. J.* **1937**, *31*, 2149–2152, doi:10.1042/bj0312149.
4. Misra, L.; Wagner, H. Lipid derivatives from *Mucuna pruriens* seeds. *Indian J. Chem. - Sect. B Org. Med. Chem.* **2006**, *45*, 801–804.
5. Natarajan, K.; Narayanan, N.; Ravichandran, N. Review on “*Mucuna*” - The wonder plant. *Int. J. Pharm. Sci. Rev. Res.* **2012**, *17*, 86–93.
6. Janardhanan, K.; Gurumoorthi, P.; Pugalenti, M.; Nutritional nutritional potential of five accessions of a south Indian tribal pulse, *Mucuna pruriens* var utilis I. The effect of processing methods on the content of L-Dopa, phytic acid, and oligosaccharides. *Trop. Subtrop. Agroecosystems* **2003**, *1*, 141–152, doi:10.1016/j.theriogenology.2015.06.019.
